# Supplementary material for: A human monoclonal antibody binds within the poliovirus receptor-binding site to neutralize all three serotypes
Source: PubMed Central journal article supplement (PMC10564760; doi:10.1038/s41467-023-41052-9), 2023-10-10
Supplement: 41467_2023_41052_MOESM1_ESM.pdf [file 41467_2023_41052_MOESM1_ESM.pdf]

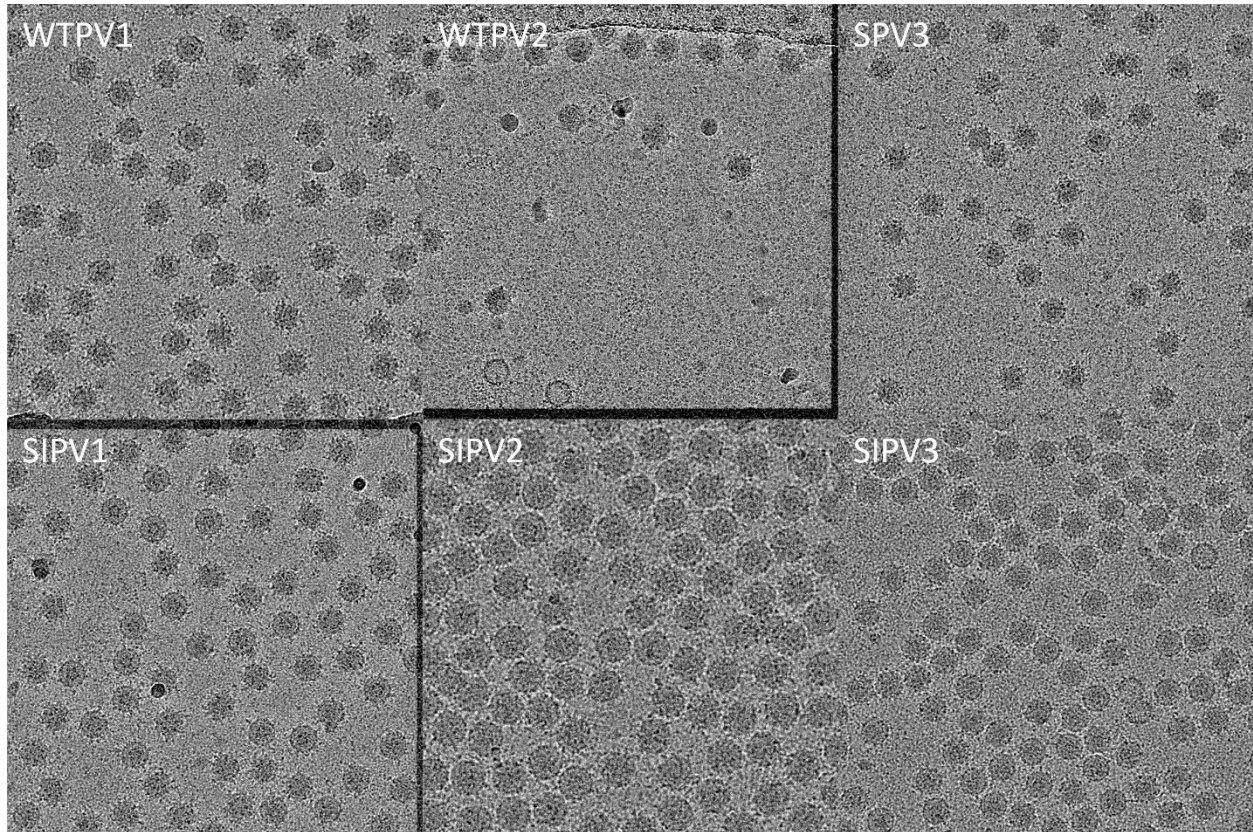

1  
2 **Supplemental Figure 1: Motion Corrected Micrographs.** Example representative motion corrected  
3 micrographs are shown. Fab is visible decorating the viral capsids. Central densities represents genome.  
4  
5

SIPV1

SIPV2

SIPV3

A

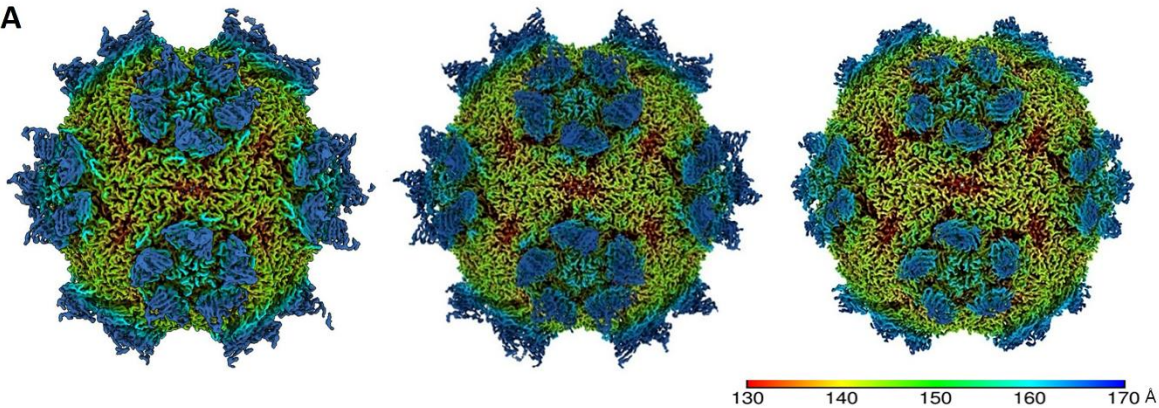

B

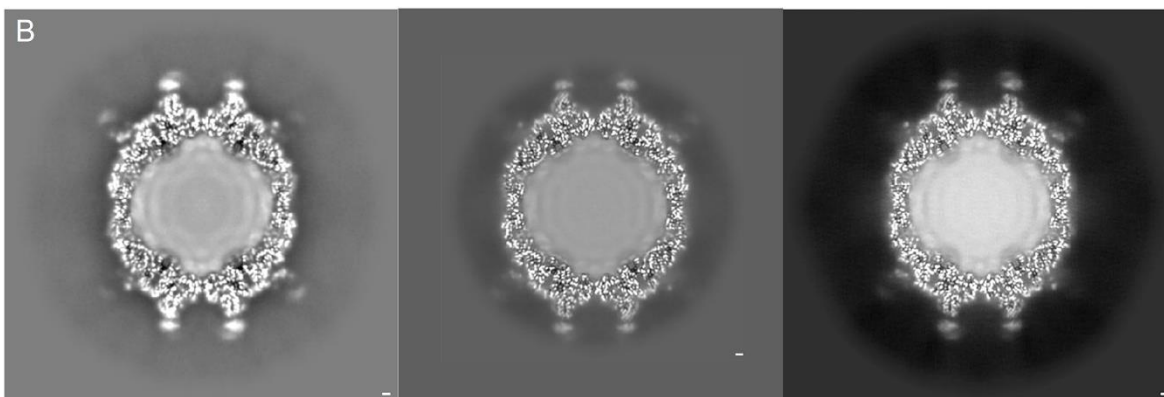

C

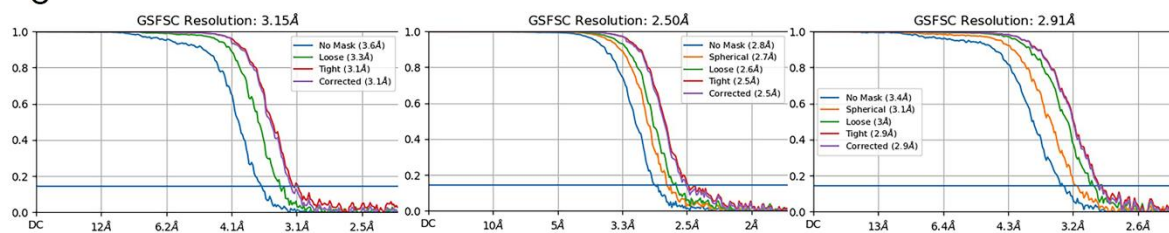

D

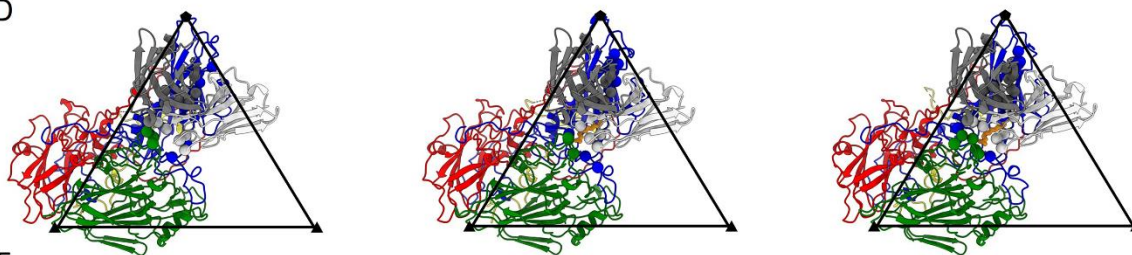

E

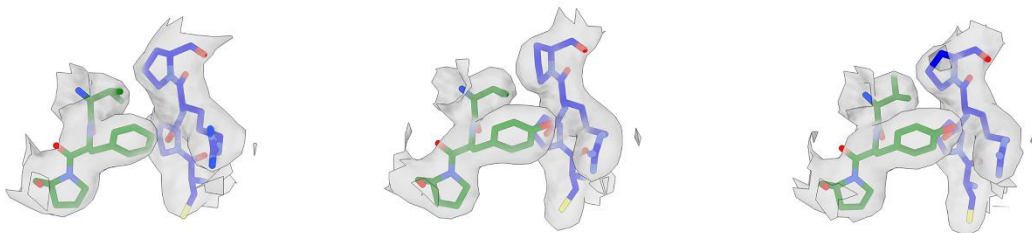

7 **Supplemental Figure 2: Inactivated Fab-virus maps: 9H2 Fab binds virus with same mode**  
8 **of binding in all three serotypes (inactivated virus):** **A:** Surface rendered DeepEMhancer  
9 sharpened maps are colored according to radius (color key) and show density corresponding to  
10 the 9H2 Fab. **B:** The central section shows the Fab has similar magnitude of density as the capsid.  
11 **C:** FSC curves indicate resolution ranging from 2.5 – 3.2 Å at the gold standard 0.143 cutoff. **D:**  
12 Refined models of single virus protomer (VP1-4; blue, green, red, yellow) and bound 9H2 variable  
13 domain (heavy and light chain; dark and light gray). SIPV1, 2 and 3 data were taken at  
14 magnification 59000x, 75000x, and 59000x resulting in pixel sizes of 1.1, 0.89, and 1.1  
15 respectively. **E:** For each complex, a representative area illustrating the quality of the model built  
16 into the map is shown. The map area highlighted includes residues VP1 270-273 and VP2 192-  
17 194. Coloration is VP1 (blue) and VP2 (green) with additional coloring by heteroatom.  
18  
19

SIPV1

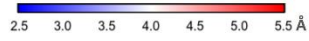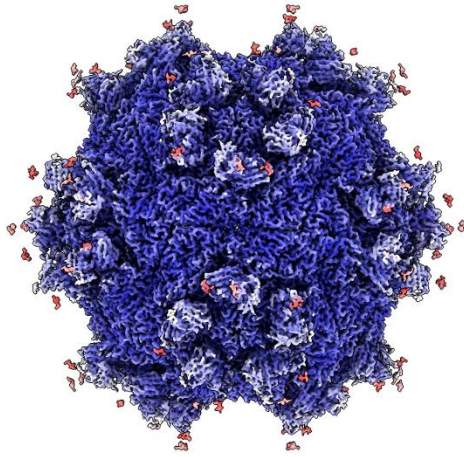

SIPV2

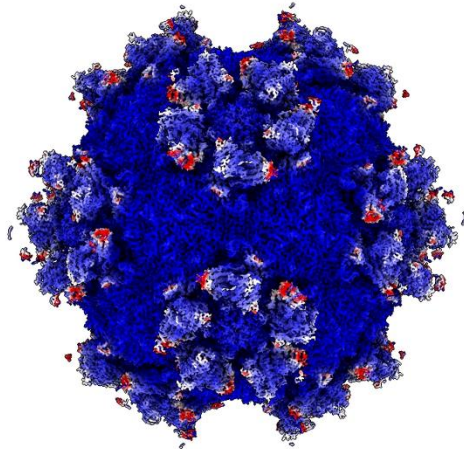

SIPV3

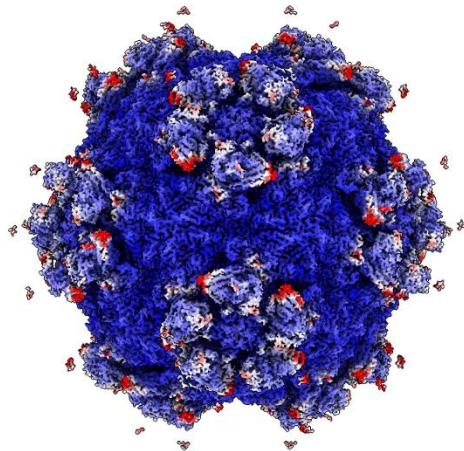

21 **Supplemental Figure 3: Local Resolution Maps:** Local resolution values were measured in  
22 Angstroms and displayed with surface rendered for each inactive virus-Fab complex. The best  
23 resolution is present in the capsid shell while the poorest is found in the hinge region of the Fab  
24 fragments.  
25  
26

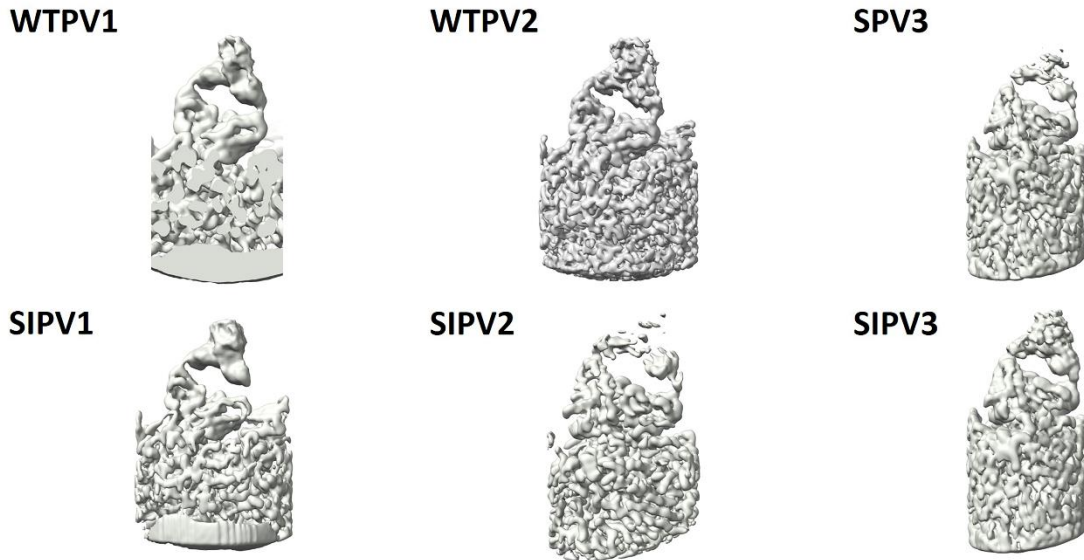

27  
28 **Supplemental Figure 4: 9H2 Subparticles:** Examples of subparticle classes for each virus  
29 complex with 9H2 are shown. Multiple subparticle classes were merged for the final maps which  
30 were recombined to produce a symbreak full icosahedral map into which virus and 9H2 were  
31 built (Methods).  
32  
33  
34

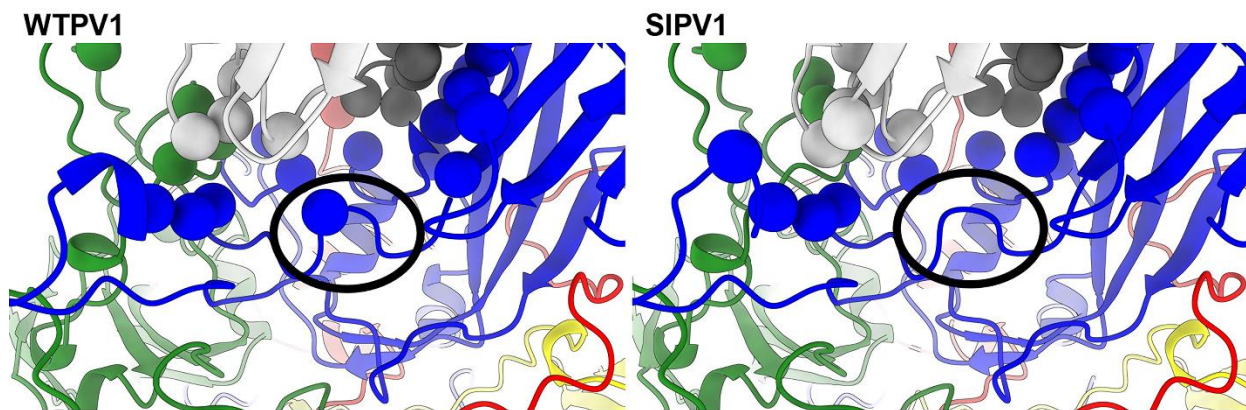

35  
36 **Supplemental Figure 5: Canyon Floor Loop:** Unlike the crystal structure 1HXS, between wild  
37 type and inactivated Sabin, the structure and conformation of the loop (black circle) comprised  
38 of VP1 residues 232-238 superimpose. Residues identified as contacts are displayed as  
39 spheres matching their chain color (heavy and light chain; dark and light gray; blue,  
40 green, red).  
41  
42

VP1 contacts 18-21

```

ISPV1 60 TVQTRHVQHRSRSESSIESFFARGACVAIIITVDNSASTKNKDKLFTVWKITYKDTVQLR 119
WTPV1 60 TVQTRHVQHRSRSESSIESFFARGACVTIMTVDNPASTTNKDKLFAVWKITYKDTVQLR 119
ISPV2 60 TVQTRHVIQRTRRSESTVESFFARGACVAIIIEVDNDAPTQRASRLFSVWKITYKDTVQLR 119
WTPV2 60 TVQTRHVIQRTRRSESTVESFFARGACVAIIIEVDNDAPTQRASKLFSVWKITYKDTVQLR 119
ISPV3 60 TVQTRHVQRRSRSESTIESFFARGACVAIIIEVDNEQPTTRAOKLFAMWRITYKDTVQLR 119
SPV3 60 TVQTRHVQRRSRSESTIESFFARGACVAIIIEVDNEQPTTRAOKLFAMWRITYKDTVQLR 119
*****:*:****:*****:*** *..:****:*****

ISPV1 120 RKLEFFTYSRFDMETFVVTANFTETNNGHALNQVYQIMYVPPGAPVPEKWDDYTWQTSS 179
WTPV1 120 RKLEFFTYSRFDMELTFVVTANFTETNNGHALNQVYQIMYVPPGAPVPEKWDDYTWQTSS 179
ISPV2 120 RKLEFFTYSRFDMETFVVTSNYIDANNHALNQVYQIMYIPPGAPIPGKWDDYTWQTSS 179
WTPV2 120 RKLEFFTYSRFDMETFVVTSNYIDANNHALNQVYQIMYIPPGAPIPGKWDDYTWQTSS 179
ISPV3 120 RKLEFFTYSRFDMETFVVTANFTNANNHALNQVYQIMYIPPGAPTPKSWDDYTWQTSS 179
SPV3 120 RKLEFFTYSRFDMETFVVTANFTNANNHALNQVYQIMYIPPGAPTPKSWDDYTWQTSS 179
*****:*****: :*****:***** *.:*****

ISPV1 180 NPSIFYTYGTAPARISVPYVGISNAYSHFYDGFSAKVPPLKQDS-AALGDSLGAASLNDFG 238
WTPV1 180 NPSIFYTYGTAPARISVPYVGISNAYSHFYDGFSAKVPPLKQDS-AALGDSLGAASLNDFG 238
ISPV2 180 NPSVFYTYGAPPARISVPYVGIANAYSHFYDGFSAKVPPLAGQA-STEGDSLGAASLNDFG 238
WTPV2 180 NPSVFYTYGAPPARISVPYVGIANAYSHFYDGFSAKVPPLAGQA-STEGDSLGAASLNDFG 238
SIPV3 180 NPSIFYTYGAAPARISVPYVGLANAYSHFYDGFSAKVPPLKTDANDQIGDSLGSAMTVDDFG 239
SPV3 180 NPSIFYTYGAAPARISVPYVGLANAYSHFYDGFSAKVPPLKTDANDQIGDSLGSAMTVDDFG 239
***:*****: *****:*****:*** : *****.* :*:***

ISPV1 239 ILAVRVVNDHNPTKVTSKIRVYLKPKHIRVWCPRPPRAVAYYGGVVDYKDGTLTPLSTKD 298
WTPV1 239 ILAVRVVNDHNPTKVTSKIRVYLKPKHIRVWCPRPPRAVAYYGGVVDYKDGTLTPLSTKD 298
ISPV2 239 SLAVRVVNDHNPTRLTSKIRVYMKPKHVRVWCPRPPRAVPYFGPGVDYKDG-LTLPPEKG 297
WTPV2 239 SLAVRVVNDHNPTKLTSLKIRVYMKPKHVRVWCPRPPRAVPYFGPGVDYKDG-LAPLPKG 297
ISPV3 240 VLAVRVVNDHNPTKVTSKVRIYMKPKHVRVWCPRPPRAVPYFGPGVDYRNN-LDPLSEKG 298
SPV3 240 VLAVRVVNDHNPTKVTSKVRIYMKPKHVRVWCPRPPRAVPYFGPGVDYRNN-LDPLSEKG 298
*****:***:*:****:*****:***** *:*****:.. * ** *.

```

VP2 contacts 3-6

```

ISPV1 121 ALGVFAVPEMCLAGDSNTTMMHTSYQANANPGEKGGTFTGTFTPDNNQTSPPARRFCVDYL 180
WTPV1 121 ALGVFAVPEMCLAGDSNTTMMHTSYQANANPGEKGGTFTGTFTPDNNQTSPPARRFCVDYL 180
ISPV2 121 ALGVFAVPEMCLAGDST-TMMHTKYENANANPGEKGGEFKGSFTLDTNATNPARNFPCVDYL 179
WTPV2 121 ALGVFAVPEMCLAGDST-TMMHTKYENANANPGEKGGEFKGSFTLDTNATNPARNFPCVDYL 179
ISPV3 121 ALGVFAIPEYCLAGDSDK-QRYTSYANANPGERGGKFKYSQFNKNNAVTSPPKREFCVDYL 179
SPV3 121 ALGVFAIPEYCLAGDSDK-QRYTSYANANPGERGGKFKYSQFNKNNAVTSPPKREFCVDYL 179
*****:*** ***** *.* *****:*** * . * . * ** *.******

```

VP3 contacts 1-2

```

ISPV1 226 RDTTHIEQKA 235 3.15 Å
WTPV1 226 RDTTHIEQKA 235 3.13
ISPV2 226 RDTTHISQEA 235 2.50
WTPV2 226 RDTTHISQEA 235 2.73
ISPV3 226 RDTTHISQSA 235 2.91
SPV3 226 RDTTHISQSA 235 2.66

```

TOTAL 9H2 CONTACTS: 23-27

44 **Supplemental Figure 6: Sequence Alignment of Polioviruses:** 9H2 contacts are highlighted  
45 in this Clustal Omega sequence alignment. Contact number is provided as low – high end  
46 estimates for 9H2 footprint residue contacts. Variation likely resulted from differences in  
47 resolution among maps and slight differences in chain and rotamer placement.  
48  
49

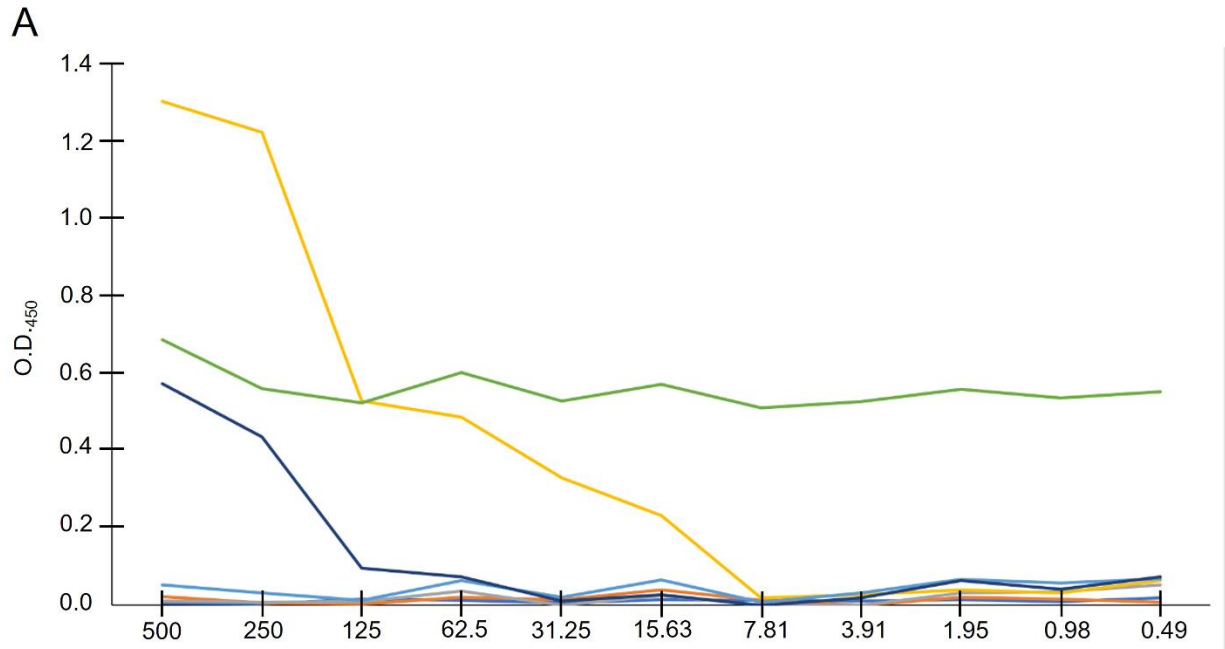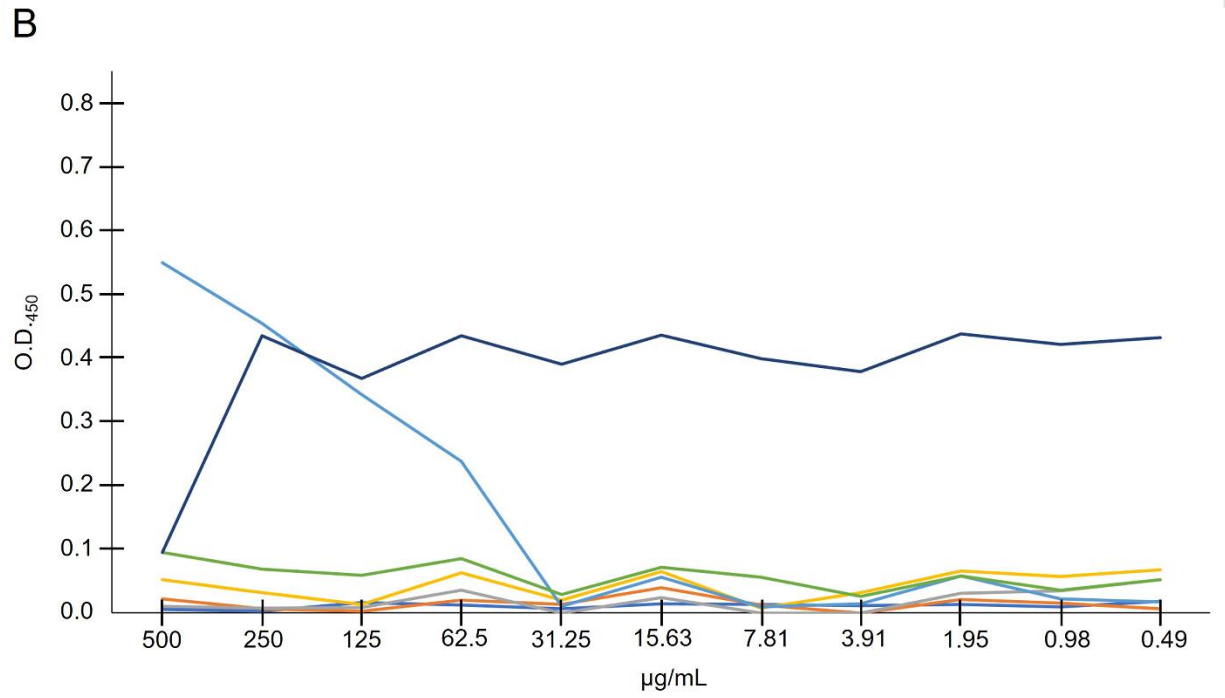

| Controls            | Experiment       |
|---------------------|------------------|
| — TBS-Tween20       | — 9H2            |
| — 9H2               | (WTPV1+sPVR+9H2) |
| — sPVR              | — sPVR           |
| — 9H2 (WTPV1+9H2)   | (WTPV1+9H2+sPVR) |
| — sPVR (WTPV1+sPVR) |                  |



51 **Supplemental Figure 7: Binding Competition ELISA:** Binding of human monoclonal antibody  
52 9H2 or recombinant soluble poliovirus receptor (sPVR) to wild type poliovirus type  
53 1(Mahoney)(WTPV1) or WTPV1 complexed with 9H2 or sPVR. Binding was assessed by  
54 enzyme-linked immunosorbent assay (ELISA) and reported optical density at 450nm. The results  
55 are representative of three independent experiments. X axes are the concentration of 9H2 mAb  
56 or sPVR in  $\mu\text{g}/\text{mL}$ . Y axes are optical density readings at 450 nm. Color key labels indicate the  
57 specimen being serially diluted and controls. For both A and B the green line indicates the ability  
58 of sPVR to compete off bound 9H2 by plotting the results of the sequential addition of virus, 9H2  
59 held constant at 0.1 mg/mL across all dilution wells, followed by PVR at various dilutions. For both  
60 A and B the blue line represents the ability for 9H2 to outcompete receptor; whereby the treatment  
61 corresponds to the sequential addition of PV1, followed by the addition of a consistent amount  
62 (0.1 mg/mL) of sPVR, and final addition of 9H2 at various dilutions. **A:** Human mAb-HRP  
63 secondary antibody was used to report 9H2 bound to captured virus. **B:** Anti-sPVR secondary  
64 mAb-HRP was used to report sPVR bound to captured virus. Application of 9H2 mAb at 0.1  
65 mg/mL is capable of preventing subsequent sPVR (at 0.5 mg/mL) binding to the virus whereas  
66 0.5 mg/mL 9H2 mAb can outcompete previously bound sPVR (at 0.1 mg/mL).  
67  
68

A

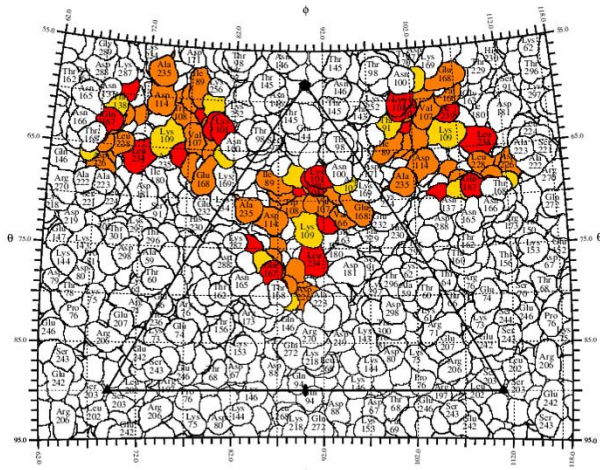

B

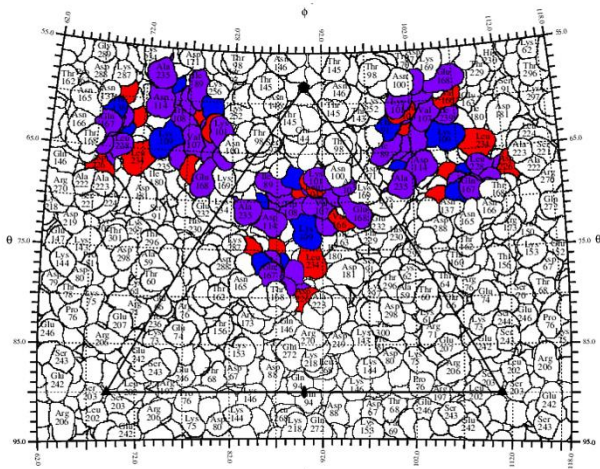

C

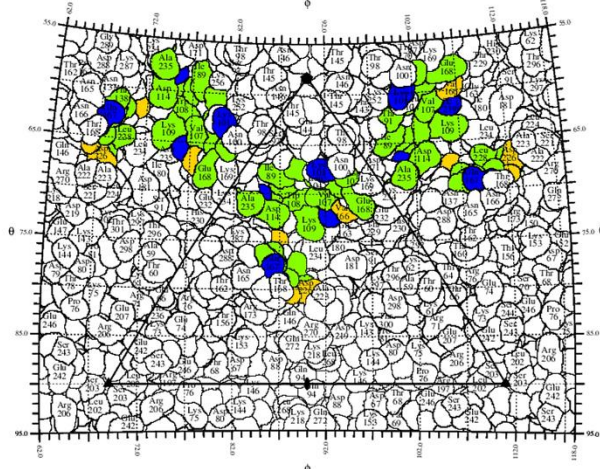

69

70 **Supplemental Figure 8: Live Footprint Comparisons: A-C:** 9H2 footprint comparisons  
71 among live PVs showing differences between serotypes. PV1 (Red), PV2 (gold), PV3 (blue).  
72 Overlaps shown; PV1 & PV2, orange; PV1 & PV3, purple; PV2 & PV3, green.

**Supplemental Table 1: Data Collection, Processing, and Refinement Statistics**

| <b>Data Collection and Processing</b>                  | WTPV1  | WTPV2 | SPV3  | SIPV1 | SIPV2    | SIPV3    |
|--------------------------------------------------------|--------|-------|-------|-------|----------|----------|
| magnification                                          | 59k    | 59k   | 120k  | 59k   | 75k      | 59k      |
| voltage (kV)                                           | 300    | 300   | 200   | 300   | 300      | 300      |
| e-/Å <sup>2</sup>                                      | 40     | 40    | 50    | 40    | 40       | 40       |
| defocus range (µm)                                     | 1-3    | 1-3   | 0.5-2 | 1-2.5 | 0.75-2.5 | 0.75-2.5 |
| pixel size (Å)                                         | 1.1    | 1.1   | 1.2   | 1.1   | 0.86     | 1.1      |
| symmetry imposed                                       | ICOS   | ICOS  | ICOS  | ICOS  | ICOS     | ICOS     |
| initial micrographs                                    | 1592   | 2284  | 3737  | 2302  | 1921     | 734      |
| final micrographs                                      | 1550   | 2185  | 2915  | 1883  | 1701     | 714      |
| particles                                              | 79471  | 11599 | 84951 | 99462 | 111182   | 52115    |
| map resolution (Å)                                     | 3.1    | 2.7   | 2.7   | 3.2   | 2.5      | 2.9      |
| <b>Refinement</b>                                      |        |       |       |       |          |          |
| model resolution*<br>d <sub>model</sub> (Å)            | 3.3    | 2.9   | 2.8   | 3.3   | 2.6      | 3.0      |
| model resolution**<br>d <sub>FSC</sub> model 0.143 (Å) | 3.1    | 2.7   | 2.6   | 3.1   | 2.5      | 2.8      |
| map sharpening B factor                                | 176.3  | 109.3 | 135.5 | 181.3 | 129.5    | 145.5    |
| non-hydrogen atoms                                     | 8318   | 8245  | 8343  | 8300  | 8310     | 8329     |
| protein residues                                       | 1068   | 1059  | 1068  | 1064  | 1066     | 1066     |
| ligands                                                | N/A    | PLM   | PLM   | N/A   | PLM      | PLM      |
| protein B factors mean (Å <sup>2</sup> )               | 100.83 | 58.74 | 57.55 | 91.93 | 54.20    | 73.54    |
| ligand B factors (Å <sup>2</sup> )                     | N/A    | 58.98 | 66.86 | N/A   | 55.04    | 70.11    |
| RMS deviation bond length (Å)                          | 0.005  | 0.006 | 0.007 | 0.004 | 0.005    | 0.005    |
| RMS deviation bond angle (°)                           | 0.774  | 0.898 | 1.083 | 0.712 | 0.792    | 0.893    |
| MolProbity score                                       | 0.95   | 1.20  | 1.11  | 1.00  | 1.13     | 1.31     |
| Clashscore                                             | 0.67   | 1.78  | 0.67  | 1.47  | 1.77     | 1.52     |
| Rotamer outliers (%)                                   | 0.11   | 1.55  | 1.74  | 1.41  | 0.44     | 1.74     |
| Ramachandran favored (%)                               | 96.49  | 97.41 | 96.67 | 98.00 | 96.77    | 96.48    |
| Ramachandran allowed (%)                               | 3.42   | 2.49  | 3.33  | 2.00  | 3.23     | 3.52     |
| Ramachandran outliers (%)                              | 0.09   | 0.10  | 0.00  | 0.00  | 0.00     | 0.00     |

74 Common statistics and parameters from the six 9H2 Fab-poliovirus complexes, with refinement  
75 statistics generated from Phenix comprehensive validation. ICOS=icosahedral. PLM=palmitic  
76 acid.

77  
78 \*Model resolution  $d_{\text{model}}$  is the resolution of the map calculated from the final model that  
79 maximizes the correlation to the experimental map<sup>1</sup>.

80 \*\*Model resolution  $d_{\text{FSC\_model}}$  is the resolution cutoff at which the model and experimental map  
81 Fourier coefficients are most similar<sup>1</sup>.

82  
83

## 84 Supplemental Table 2: Capsid Contacts

85

### WTPV1

---

|     |                                                                                    |
|-----|------------------------------------------------------------------------------------|
| VP1 | 87 88 89 90 101 102 104 105 106 107 108 114 166 168 226 227 228 234 239 280<br>282 |
| VP2 | 139 140 142 167                                                                    |
| VP3 | 233 235                                                                            |

### SIPV1

---

|     |                                                                                    |
|-----|------------------------------------------------------------------------------------|
| VP1 | 87 88 89 90 101 104 105 106 107 108 109 114 166 168 169 223 226 227 228 280<br>282 |
| VP2 | 138 139 140 167                                                                    |
| VP3 | 235                                                                                |

### WTPV2

---

|     |                                                                     |
|-----|---------------------------------------------------------------------|
| VP1 | 87 88 89 91 102 103 105 106 107 108 109 114 166 168 226 227 228 282 |
| VP2 | 137 138 139 141 171                                                 |
| VP3 | 233 235                                                             |

### SIPV2

---

|     |                                                                     |
|-----|---------------------------------------------------------------------|
| VP1 | 87 88 89 90 100 101 103 105 106 107 108 114 166 168 228 234 239 282 |
| VP2 | 137 138 139 141                                                     |
| VP3 | 235                                                                 |

### SPV3

---

|     |                                                                     |
|-----|---------------------------------------------------------------------|
| VP1 | 87 88 89 91 101 102 103 105 106 107 108 109 114 115 168 228 229 240 |
| VP2 | 137 138 139 140 141 166                                             |
| VP3 | 233 235                                                             |

### SIPV3

---

|     |                                                                         |
|-----|-------------------------------------------------------------------------|
| VP1 | 87 88 89 91 100 101 102 103 105 106 107 108 114 168 224 228 229 240 281 |
| VP2 | 137 140 141                                                             |
| VP3 | 235                                                                     |

---

86 Identified contact residue numbers in each 9H2-poliovirus complex for each virus chain.

87

88

89 **Supplemental Table 3: 9H2 Contacts**

90

WTPV1

|             |                                                   |
|-------------|---------------------------------------------------|
| Heavy chain | 81 119 120 121 122 123 124<br>125 127 128 129 130 |
| Light chain | 45 46 50 73 74 114 115                            |

WTPV2

|             |                                               |
|-------------|-----------------------------------------------|
| Heavy chain | 74 121 122 123 124 125 127<br>128 129 130 131 |
| Light chain | 45 46 50 74 114 115                           |

SPV3

|             |                                                      |
|-------------|------------------------------------------------------|
| Heavy chain | 74 81 120 121 122 123 124<br>125 127 128 129 130 131 |
| Light chain | 44 45 46 50 52 73 74 114 115                         |

SIPV1

|             |                                                   |
|-------------|---------------------------------------------------|
| Heavy chain | 81 119 120 121 122 123 124<br>125 127 128 129 130 |
| Light chain | 45 46 50 73 74 75 90 113 114<br>115               |

SIPV2

|             |                                               |
|-------------|-----------------------------------------------|
| Heavy chain | 46 120 121 123 124 125 127<br>128 129 130 131 |
| Light chain | 45 46 49 50 74 114 115                        |

SIPV3

|             |                                                   |
|-------------|---------------------------------------------------|
| Heavy chain | 46 120 121 122 123 124 125<br>127 128 129 130 131 |
| Light chain | 45 46 50 73 74 90 115                             |

91 Identified contact residue numbers in each 9H2-poliovirus complex for each Fab chain.

92

93

94

**Supplemental Table 4: 9H2 Fab Binding Constants**

|       | KD (M)                   | Ka (1/Ms)               | Ka error                | Kd (1/s)                 | Kd error                 |
|-------|--------------------------|-------------------------|-------------------------|--------------------------|--------------------------|
| SPV1  | 9.364 x 10 <sup>-4</sup> | 1.122 x 10 <sup>3</sup> | 8.470 x 10 <sup>4</sup> | 1.050                    | 0.1795                   |
| SIPV2 | 2.097 x 10 <sup>-6</sup> | 2.301 x 10 <sup>5</sup> | 1.182 x 10 <sup>5</sup> | 0.4826                   | 0.1374                   |
| SPV3  | 3.232 x 10 <sup>-6</sup> | 1.461 x 10 <sup>5</sup> | 6.838 x 10 <sup>4</sup> | 4.769 x 10 <sup>-2</sup> | 4.769 x 10 <sup>-2</sup> |

95 9H2 Fab binding constants as provided by analysis of biolayer interferometry data.

96

97

98

99

100

101

102

103  
104  
105  
106  
107  
108  
109

Supplemental References:

- 1) Afonine, P. V., Klaholz, B. P., Moriarty, N. W., Poon, B. K., Sobolev, O. V., Terwilliger, T. C., Adams, P. D., & Urzhumtsev, A. (2018). New tools for the analysis and validation of cryo-EM maps and atomic models. *Acta Crystallographica Section D Structural Biology*, 74(9), 814–840. <https://doi.org/10.1107/S2059798318009324>
